# Supplementary material for: Exon architecture controls mRNA m6A suppression and gene expression
Source: PubMed Central journal article supplement (PMC9990141; doi:10.1126/science.abj9090), 2023-01-27
Supplement: NIHMS1874593-supplement-Sup__Table_Captions.pdf [file NIHMS1874593-supplement-Sup__Table_Captions.pdf]

**Table S1 to S6**

**Table S1.** Knockdown efficiency of *EIF4A3*, *RBM8A*, *RNPS1*, *UPF1* in m<sup>6</sup>A-meRIP-seq experiments.

**Table S2.** EIF4A3-suppressed and RNPS1-suppressed splice sites in proximity to EIF4A3-suppressed m<sup>6</sup>A regions.

**Table S3.** Tissue m<sup>6</sup>A peaks that contain EJC-suppressed m<sup>6</sup>A regions and span exon-intron boundaries.

**Table S4.** Retained intron tissue m<sup>6</sup>A peaks that contain EJC-suppressed m<sup>6</sup>A regions.

**Table S5.** m<sup>6</sup>A-QTL-associated m<sup>6</sup>A peaks that contain EJC-suppressed m<sup>6</sup>A regions.

**Table S6.** Oligonucleotide sequences, antibodies, and other reagents used in this study.
